# Supplementary material
Source: publisher figshare collection journal article supplement (https://geolsoc.figshare.com/ndownloader/files/26245320)
Supplement: Supplementary file 1 [file 26245320]

|  | Monteró | Montroig | ODB and Tragó | Millà  Anticline | Sant Mamet | Àger Ribagorça | Àger Pallaresa | Montsec Ribagorça | Montsec Pallaresa |
| --- | --- | --- | --- | --- | --- | --- | --- | --- | --- |
| Oligocene | 855 | 200 | 350 | 90 | 0 | 0 | 0 | 0 | 0 |
| Lutetian | 220 | 0 | 0 | 0 | 0 | 0 | 0 | 0 | 0 |
| Ypresian | 40 | 180 | 350 | 655 | 580 | 480 | 1210 | 0 | 0 |
| Garumnian | 30 | 245 | 310 | 665 | 740 | 300 | 35 | 55 | 0 |
| Maastrichtian-Campanian | 20 | 325 | 350 | 450 | 450 | 0 | 50 | 1100 | 838 |
| Upper Santonian | 0 | 80 | 30 | 75 | 75 | 95 | 0 | 435 | 385 |
| Coniacian-Lower Santonian | 0 | 0 | 0 | 0 | 0 | 20 | 0 | 100 | 60 |
| Cenomanian-Turonian | 0 | 0 | 0 | 0 | 0 | 100 | 0 | 80 | 70 |
| Lower Cretaceous. | 0 | 0 | 0 | 0 | 105 | 130 | 0 | 441 | 480 |
| Malm | 0 | 70 | 0 | 0 | 0 | 0 | 0 | 0 | 200 |
| Dogger | 0 | 200 | 0 | 75 | 150 | 100 | 0 | 80 | 250 |
| Lias | 20 | 300 | 155 | 150 | 0 | 80 | 0 | 197 | 280 |
| Lias gypsum | 0 | 290 | 30 | 0 | 0 | 0 | 0 | 0 | 0 |
| Rhaetian limestone | 40 | 0 | 50 | 0 | 0 | 0 | 0 | 10 | 20 |
| Keuper | 120 | 120 | 50 | 50 | 0 | 0 | 0 | 40 | 115 |

Table 1, Thickness of the stratigraphic succession in representative sections of the study area (in metres). Data from stratigraphic logs in the ICGC 1:25.000 maps.
